# Supplementary material
Source: publisher site journal article supplement (https://www.dovepress.com/article/529193)
Supplement: Supplementary file 1 [file 529193%20Revised%20Supplementary%20Material.docx]

**Inclusion criteria**

(1) Age 18-75 years old, male or female, voluntary and signed informed consent for this experiment;

(2) Patients undergoing thoracoscopic pulmonary resection under general anesthesia during the day;

(3) ASA Grade I-II;

**Exclusion criteria**

(1) Patients who have undergone surgery following the meridian line at the meridian point;

(2) Patients with local skin infection at meridian points;

(3) Patients with upper or lower limb nerve damage;

(4) Patients with a long history of sedation, pain relief, or antidepressant use;

(5) Patients with prior surgical history and chronic incision pain;

(6) Patients who are unable to complete the study plan, including language difficulties, infectious diseases and other medical histories.

**Anesthesia management**

Both groups were treated with standardized general anesthesia and nerve block.

Methods of anesthesia: patient was admitted into the room, routine monitoring, mask pre-oxygenation, inhaled oxygen concentration of 100%. After induction of anesthesia, endotracheal intubation was performed, and ultrasound-guided T4-7 thoracic paravertebral nerve block was performed after lateral lateral position. During the operation, single lung ventilation was performed, protective lung ventilation strategy was adopted, 41℃ infusion heating and warm air heater were used, analgesic drugs were given as needed during the operation, and postoperative patient controlled analgesia (PCA) measures were not routinely applied.

Intraoperative administration: The plasma target concentration of propofol was 3.0-4.0μg /ml, sufentanil 0.5μg /kg and rocuronium 0.6-0.9 mg/kg for anesthesia induction. The nerve blocking drug was 30ml 0.5% ropivacaine, which is carefully diluted with sterile normal saline. The plasma target concentration of propofol was 2.0-3.0μg /ml, remifentanil was 2.0-3.0 ng/ml, and rocuronium was 0.6-0.8 mg/kg/h. The target dual frequency index (BIS) is between 40-60. Heart rate and blood pressure will be maintained within 20% of the baseline value. After the operation, Burentin was given 200mg of antagonistic muscle relaxant.
